# Supplementary material
Source: Springer Nature journal article supplement (https://www.springermedizin.de/resource/supplementary/12906_2013_1507_MOESM6_ESM.pdf/9522080)

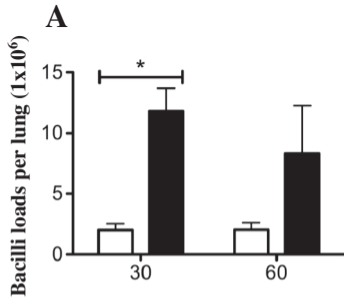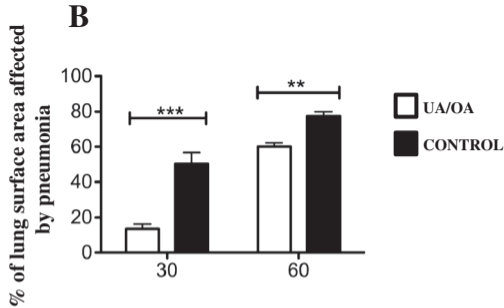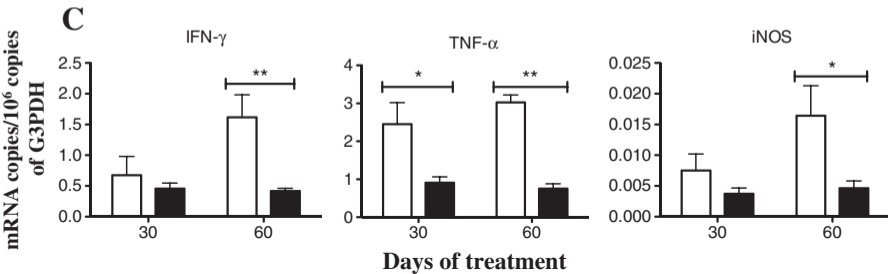

Supplement: MOESM6 [file 9522080]
